# Supplementary material for: Reduced MLH3 Expression in the Syndrome of Gan‐Shen Yin Deficiency in Patients with Different Diseases
Source: Hindawi journal article supplement (doi:10.1155/2017/4109828), 2017-01-01
Supplement: f1 [file 4109828.f1.pdf]

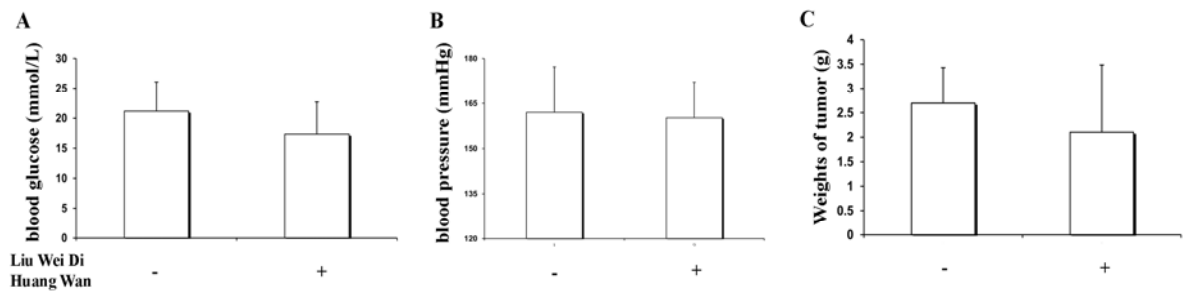

Fig. 1S Liu Wei Di Huang Wan had no effects on the hyperglycemia (A), the hypertension (B) and the size of tumor (C) in *MLH3*(-/+ ) mice with hyperglycemia, hypertension and tumor, separately.

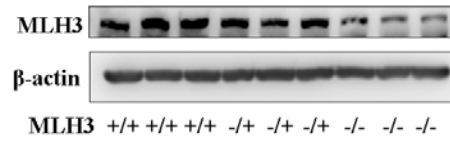

Fig. 2S The expression of MLH3 in WT mice, *MLH3*<sup>-/+</sup> mice and *MLH3*<sup>-/-</sup> mice. The expression of MLH3 was detected by western-blot.
